# Supplementary material for: Elevated levels of IRF1 and CASP1 as pyroptosis-related biomarkers for intestinal epithelial cells in Crohn’s disease
Source: Frontiers journal article supplement (doi:10.3389/fimmu.2025.1551547), 2025-02-13
Supplement: Table_4.xls [file Table_4.xls]

## Sheet: deg_pyroptosis
	logFC	AveExpr	t	P.Value	adj.P.Val	B	change
CASP1	1.33842	9.38307	11.3449	1.66e-19	3.78e-17	33.7407	up
IRF1	0.95143	9.67547	10.2867	3.13e-17	3.55e-15	28.5296	up
MMP1	3.64984	9.0893	9.09963	1.15e-14	8.73e-13	22.6568	up
STAT2	0.609923	8.61175	7.56834	2.16e-11	9.82e-10	15.1873	up
GBP5	1.98799	7.52957	6.92837	4.64e-10	1.5e-08	12.1603	up
ZBP1	0.689754	7.40398	6.75219	1.06e-09	3.02e-08	11.3421	up
IL1B	2.60281	7.8103	6.7071	1.31e-09	3.16e-08	11.1339	up
MLKL	0.669627	7.38056	6.67638	1.52e-09	3.16e-08	10.9924	up
ICAM1	1.45428	8.43608	6.58636	2.31e-09	4.03e-08	10.579	up
CEP55	0.773766	7.37893	6.27319	9.79e-09	1.39e-07	9.15797	up
CD274	1.29094	6.58482	6.16756	1.59e-08	2.12e-07	8.68515	up
H3C11	0.590436	10.3904	6.1472	1.74e-08	2.19e-07	8.59442	up
CXCL8	2.02642	7.78957	6.115	2.01e-08	2.4e-07	8.45119	up
HTRA1	0.508895	8.27173	5.88569	5.64e-08	6.4e-07	7.44111	up
PPARG	-1.02513	8.62072	-5.86275	6.24e-08	6.75e-07	7.34102	down
PTGS2	2.01257	7.13356	5.7346	1.1e-07	1.09e-06	6.78555	up
PRDM1	0.948488	8.44842	5.69406	1.32e-07	1.24e-06	6.61104	up
SETD7	0.711719	8.35999	5.48979	3.21e-07	2.8e-06	5.74146	up
CTSV	-0.525121	5.27242	-5.38383	5.06e-07	4.25e-06	5.29697	down
IFI16	0.914564	8.01434	5.30304	7.13e-07	5.78e-06	4.96118	up
CEBPB	0.554933	8.54288	5.15037	1.36e-06	1.06e-05	4.33437	up
TREM1	1.29734	6.42301	5.09505	1.71e-06	1.25e-05	4.10981	up
H2BC14	0.644832	9.64614	4.96336	2.95e-06	1.91e-05	3.58089	up
CASP4	0.603645	8.3039	4.95632	3.04e-06	1.92e-05	3.55286	up
CASP5	1.01217	9.7298	4.78783	6.03e-06	3.51e-05	2.88887	up
TIFA	0.807015	6.80134	4.77114	6.45e-06	3.66e-05	2.82386	up
FPR2	1.24618	5.53366	4.70548	8.38e-06	4.6e-05	2.56948	up
GZMB	0.532042	6.87059	4.58303	1.36e-05	6.72e-05	2.10105	up
GJA1	0.63761	6.68851	4.50547	1.84e-05	8.72e-05	1.80845	up
IL1A	1.3077	5.84186	4.33755	3.52e-05	0.000153743	1.1863	up
SLC16A4	1.26684	8.04511	4.22196	5.45e-05	0.000223521	0.767282	up
GNA15	0.606275	7.41196	4.09361	8.78e-05	0.000335503	0.311247	up
ANXA1	0.880828	9.6168	3.40526	0.000961924	0.00272946	-1.95669	up
MST1	0.538815	7.46632	3.13487	0.00227351	0.00579873	-2.75855	up
TNFRSF11B	0.503252	6.73568	3.12672	0.00233147	0.00588048	-2.78188	up
NEDD4	0.500991	7.6633	2.87828	0.00491613	0.0111596	-3.46912	up
NLRP6	0.791595	8.9244	2.70967	0.00796052	0.0174007	-3.90815	up
TLR4	0.512715	7.47249	2.47736	0.0149606	0.0303219	-4.47548	up
